# Supplementary material
Source: ML conference proceedings conference paper supplement (https://proceedings.mlr.press/v48/michaeli16.html)
Supplement: Supplementary file [file michaeli16-supp.pdf]

---

# Nonparametric Canonical Correlation Analysis

## Supplementary Material

---

**Tomer Michaeli**

Technion–Israel Institute of Technology, Haifa, Israel

TOMER.M@EE.TECHNION.AC.IL

**Weiran Wang**

TTI-Chicago, Chicago, IL 60637, USA

WEIRANWANG@TTIC.EDU

**Karen Livescu**

TTI-Chicago, Chicago, IL 60637, USA

KLIVESCU@TTIC.EDU

### 1. Proof of Lemma 3.1

*Proof.* Let the eigen-decomposition of the second-order moment of  $\mathbb{E}[\mathbf{f}(X)|Y]$  be  $\mathbb{E}[\mathbb{E}[\mathbf{f}(X)|Y]\mathbb{E}[\mathbf{f}(X)|Y]^\top] = \mathbf{A}\mathbf{D}\mathbf{A}^\top$  and define  $U = \mathbf{A}^\top \mathbb{E}[\mathbf{f}(X)|Y]$  and  $\tilde{\mathbf{g}}(Y) = \mathbf{A}^\top \mathbf{g}(Y)$ . Then the objective in (3) can be written as  $\mathbb{E}[\mathbf{f}(X)^\top \mathbf{g}(Y)] = \mathbb{E}[\mathbb{E}[\mathbf{f}(X)|Y]^\top \mathbf{g}(Y)] = \mathbb{E}[(\mathbf{A}^\top \mathbb{E}[\mathbf{f}(X)|Y])^\top (\mathbf{A}^\top \mathbf{g}(Y))] = \mathbb{E}[U^\top \tilde{\mathbf{g}}(Y)]$ . Similarly, the constraint  $\mathbf{I} = \mathbb{E}[\mathbf{g}(Y)\mathbf{g}(Y)^\top]$  can be expressed as  $\mathbf{I} = \mathbf{A}^\top \mathbf{A} = \mathbb{E}[(\mathbf{A}^\top \mathbf{g}(Y))(\mathbf{A}^\top \mathbf{g}(Y))^\top] = \mathbb{E}[\tilde{\mathbf{g}}(Y)\tilde{\mathbf{g}}(Y)^\top]$ . Therefore, the optimization problem (3) can be written in terms of  $\tilde{\mathbf{g}}$  as

$$\max_{\tilde{\mathbf{g}}} \mathbb{E}[U^\top \tilde{\mathbf{g}}(Y)] \quad \text{s.t.} \quad \mathbb{E}[\tilde{\mathbf{g}}(Y)\tilde{\mathbf{g}}(Y)^\top] = \mathbf{I}. \quad (1)$$

Our objective is the sum of correlations in all  $L$  dimensions. Let us consider the correlation in the  $j$ th dimension. From the Cauchy-Schwartz inequality, we have

$$\mathbb{E}[U_j \tilde{g}_j(Y)] \leq \sqrt{\mathbb{E}[U_j^2] \mathbb{E}[\tilde{g}_j(Y)^2]} = \sqrt{\mathbb{E}[U_j^2]}$$

with equality if and only if  $\tilde{g}_j(Y) = c_j U_j$  for some scalar  $c_j$  with probability 1. Note that choosing each  $\tilde{g}_j(Y)$  to be proportional to  $U_j$  is valid, since the dimensions of  $U$  are uncorrelated (as  $\mathbb{E}[UU^\top] = \mathbf{A}^\top \mathbb{E}[\mathbb{E}[\mathbf{f}(X)|Y]\mathbb{E}[\mathbf{f}(X)|Y]^\top] \mathbf{A} = \mathbf{D}$ ). In order for each  $\tilde{g}_j(Y)$  to have unit second order moment, we must have  $c_j = 1/\sqrt{\mathbb{E}[U_j^2]} = 1/\sqrt{\mathbf{D}_{jj}}$ . Therefore,  $\tilde{\mathbf{g}}(Y) = \mathbf{D}^{-1/2}U$  so that  $\mathbf{g}(Y) = \mathbf{A}\mathbf{D}^{-\frac{1}{2}}\mathbf{A}^\top U = (\mathbb{E}[\mathbb{E}[\mathbf{f}(X)|Y]\mathbb{E}[\mathbf{f}(X)|Y]^\top])^{-1/2}\mathbb{E}[\mathbf{f}(X)|Y]$ , proving the lemma.  $\square$
